# Supplementary material for: Dual-core optofluidic chip for independent particle detection and tunable spectral filtering
Source: Royal Society of Chemistry journal article supplement (doi:10.1039/c2lc40700k), 2012-01-01
Supplement: c2lc40700k.pdf [file c2lc40700k.pdf]

SUPPORTING MATERIAL

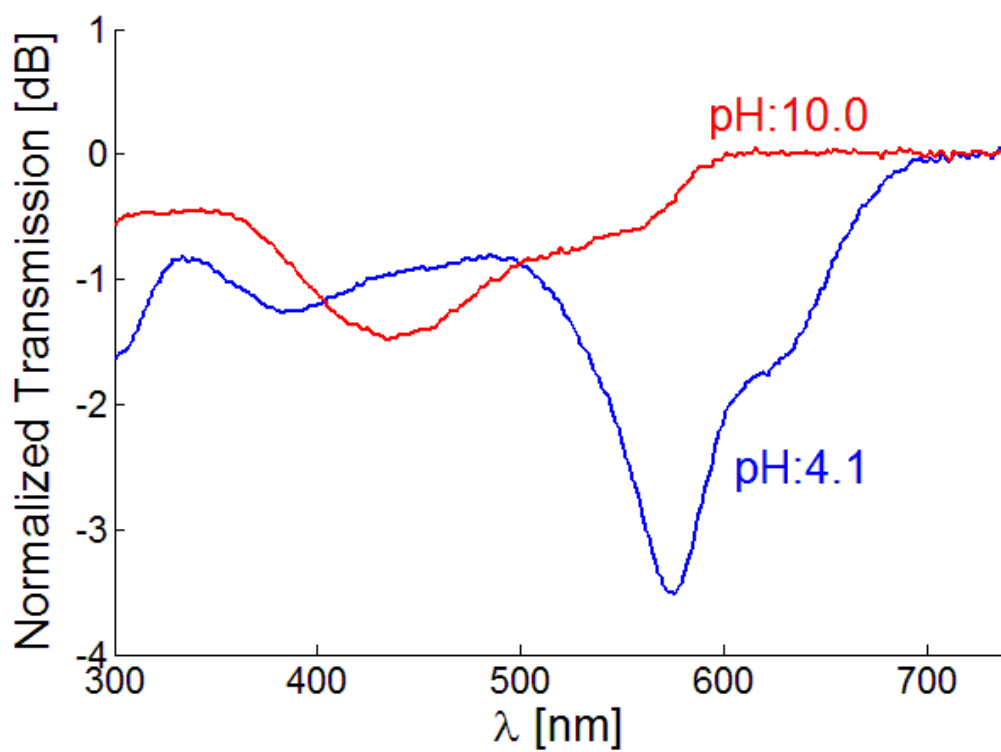

Fig. S1: Normalized transmission absorbance spectra of universal indicator for two different pH values measured using a NanoDrop spectrophotometer.
